# Supplementary material for: SimpactCyan 1.0: An Open-source Simulator for Individual-Based Models in HIV Epidemiology with R and Python Interfaces
Source: bioRxiv or medRxiv preprint supplement (doi:10.1101/440834), 2019-11-21
Supplement: Supplementary file [file media-1.pdf]

| <b>Table S1. Model calibration results: model and target features.</b> |                |                |                |                       |                     |
|------------------------------------------------------------------------|----------------|----------------|----------------|-----------------------|---------------------|
|                                                                        | <b>Model 1</b> | <b>Model 2</b> | <b>Model 3</b> | <b>Target feature</b> | <b>Source</b>       |
| <b>Demography</b>                                                      |                |                |                |                       | World Bank, 2018    |
| Average annual population growth rate in 2000 - 2016                   | -0.20%         | 1.10%          | 2.20%          | 1.50%                 |                     |
| <b>HIV prevalence</b>                                                  |                |                |                |                       | Bicego et al. 2013  |
| 18-19 year-old women                                                   | 18.30%         | 17.00%         | 23.10%         | 14.30%                |                     |
| 18-19 year-old men                                                     | 1.40%          | 1.20%          | 3.40%          | 0.80%                 |                     |
| 20-24 year-old women                                                   | 29.20%         | 30.10%         | 32.80%         | 31.50%                |                     |
| 20-24 year-old men                                                     | 7.50%          | 7.90%          | 10.30%         | 6.60%                 |                     |
| 25-29 year-old women                                                   | 47.00%         | 44.80%         | 41.90%         | 46.70%                |                     |
| 25-29 year-old men                                                     | 21.40%         | 21.70%         | 23.80%         | 21.30%                |                     |
| 30-34 year-old women                                                   | 52.70%         | 55.50%         | 44.60%         | 53.80%                |                     |
| 30-34 year-old men                                                     | 35.50%         | 36.90%         | 38.30%         | 36.60%                |                     |
| 35-39 year-old women                                                   | 50.80%         | 50.80%         | 41.80%         | 49.10%                |                     |
| 35-39 year-old men                                                     | 38.50%         | 42.40%         | 42.50%         | 47.00%                |                     |
| 40-44 year-old women                                                   | 45.00%         | 46.70%         | 42.40%         | 39.70%                |                     |
| 40-44 year-old men                                                     | 37.90%         | 41.80%         | 41.70%         | 45.50%                |                     |
| 45-49 year-old women                                                   | 39.70%         | 43.00%         | 33.40%         | 31.60%                |                     |
| 45-49 year-old men                                                     | 33.60%         | 36.40%         | 32.40%         | 42.50%                |                     |
| <b>HIV incidence (per 100 person-years)</b>                            |                |                |                |                       | Justman et al. 2017 |
| 18-19 year-old women                                                   | 6.3            | 5.2            | 6              | 3.8                   |                     |
| 18-19 year-old men                                                     | 0.8            | 1              | 1.9            | 0.8                   |                     |
| 20-24 year-old women                                                   | 5.2            | 5              | 4.7            | 4.3                   |                     |
| 20-24 year-old men                                                     | 2.6            | 2.8            | 2.9            | 1.6                   |                     |
| 25-29 year-old women                                                   | 2.4            | 3.2            | 2.8            | 2                     |                     |
| 25-29 year-old men                                                     | 4.7            | 4.3            | 4.8            | 2.6                   |                     |
| 30-34 year-old women                                                   | 1.5            | 5.6            | 2.2            | 2.7                   |                     |
| 30-34 year-old men                                                     | 2.9            | 4.7            | 5.4            | 3.1                   |                     |
| 35-39 year-old women                                                   | 1.3            | 0.7            | 0.9            | 4                     |                     |
| 35-39 year-old men                                                     | 2.5            | 3.4            | 2.5            | 0.4                   |                     |
| 40-44 year-old women                                                   | 0.8            | 0.2            | 0.6            | 2.1                   |                     |
| 40-44 year-old men                                                     | 1.4            | 1.7            | 2.8            | 1.2                   |                     |
| 45-49 year-old women                                                   | 0              | 0.7            | 0.3            | 1.2                   |                     |
| 45-49 year-old men                                                     | 0              | 1.4            | 1.3            | 0                     |                     |
| <b>ART coverage in &gt;=15 year-old adults</b>                         |                |                |                |                       | UNAIDS, 2019        |
| 2010                                                                   | 39.90%         | 34.20%         | 25.00%         | 37%                   |                     |
| 2011                                                                   | 46.10%         | 40.30%         | 32.00%         | 40%                   |                     |
| 2012                                                                   | 49.40%         | 43.60%         | 36.60%         | 44%                   |                     |
| 2013                                                                   | 51.30%         | 46.00%         | 40.20%         | 49%                   |                     |
| 2014                                                                   | 64.30%         | 62.20%         | 58.50%         | 58%                   |                     |
| 2015                                                                   | 64.80%         | 64.30%         | 62.10%         | 67%                   |                     |
| 2016                                                                   | 65.10%         | 66.20%         | 64.20%         | 76%                   |                     |
| 2017                                                                   | 78.90%         | 83.10%         | 84.20%         | 85%                   |                     |
| <b>Virology</b>                                                        |                |                |                |                       | UNAIDS, 2019        |

|                                                                                                              |        |        |        |        |              |
|--------------------------------------------------------------------------------------------------------------|--------|--------|--------|--------|--------------|
| fraction of $\geq 15$ year-old adults who were virally suppressed (less than 1000 viral copies per mL blood) | 82.50% | 85.80% | 86.80% | 74%    |              |
| <b><i>HIV prevalence in 15-49 year-old adults</i></b>                                                        |        |        |        |        | UNAIDS, 2019 |
| 1990                                                                                                         | 2.20%  | 1.70%  | 1.90%  | 1.70%  |              |
| 1991                                                                                                         | 3.90%  | 2.40%  | 3.10%  | 3.30%  |              |
| 1992                                                                                                         | 6.10%  | 3.80%  | 5.00%  | 5.70%  |              |
| 1993                                                                                                         | 8.60%  | 5.60%  | 7.90%  | 8.80%  |              |
| 1994                                                                                                         | 11.80% | 7.90%  | 11.50% | 12.40% |              |
| 1995                                                                                                         | 15.40% | 11.10% | 15.40% | 16.10% |              |
| 1996                                                                                                         | 18.90% | 13.90% | 18.60% | 19.40% |              |
| 1997                                                                                                         | 21.90% | 16.40% | 20.60% | 22.00% |              |
| 1998                                                                                                         | 24.50% | 18.90% | 22.00% | 23.90% |              |
| 1999                                                                                                         | 26.20% | 20.80% | 22.60% | 25.10% |              |
| 2000                                                                                                         | 27.10% | 22.00% | 22.90% | 25.80% |              |
| 2001                                                                                                         | 27.60% | 22.80% | 23.00% | 26.10% |              |
| 2002                                                                                                         | 28.10% | 23.50% | 22.90% | 26.10% |              |
| 2003                                                                                                         | 28.10% | 24.20% | 22.50% | 25.90% |              |
| 2004                                                                                                         | 27.90% | 24.50% | 22.40% | 25.70% |              |
| 2005                                                                                                         | 27.70% | 24.80% | 22.30% | 25.50% |              |
| 2006                                                                                                         | 27.40% | 24.80% | 22.20% | 25.60% |              |
| 2007                                                                                                         | 27.30% | 24.80% | 22.60% | 25.90% |              |
| 2008                                                                                                         | 26.80% | 25.00% | 22.80% | 26.30% |              |
| 2009                                                                                                         | 26.90% | 25.30% | 23.20% | 26.80% |              |
| 2010                                                                                                         | 26.70% | 25.40% | 23.70% | 27.40% |              |
| 2011                                                                                                         | 26.30% | 25.40% | 24.20% | 27.80% |              |
| 2012                                                                                                         | 26.10% | 25.40% | 24.60% | 28.20% |              |
| 2013                                                                                                         | 26.20% | 25.50% | 25.00% | 28.40% |              |
| 2014                                                                                                         | 25.90% | 25.50% | 25.00% | 28.40% |              |
| 2015                                                                                                         | 25.70% | 25.20% | 25.00% | 28.30% |              |
| 2016                                                                                                         | 25.50% | 25.00% | 24.90% | 27.90% |              |
| 2017                                                                                                         | 25.10% | 24.40% | 24.50% | 27.40% |              |
