# Supplementary material for: SimpactCyan 1.0: An Open-source Simulator for Individual-Based Models in HIV Epidemiology with R and Python Interfaces
Source: bioRxiv or medRxiv preprint supplement (doi:10.1101/440834), 2019-11-21
Supplement: Supplementary file [file media-2.pdf]

| <b>Table S2. Evolutionary models fitted to empirical and synthetic data.</b> |                       |                       |  |
|------------------------------------------------------------------------------|-----------------------|-----------------------|--|
|                                                                              | <b>Empirical data</b> | <b>Synthetic data</b> |  |
| <b><i>Relative Frequencies</i></b>                                           |                       |                       |  |
| adenine (A)                                                                  | 0.3906                | 0.3929                |  |
| cytosine (C)                                                                 | 0.1752                | 0.1726                |  |
| guanine (G)                                                                  | 0.2201                | 0.2234                |  |
| thymine (T)                                                                  | 0.2142                | 0.2111                |  |
| <b><i>Rate heterogeneity</i></b>                                             |                       |                       |  |
| shape parameter                                                              | 0.6250                | 0.6244                |  |
| <b><i>Relative substitution rates</i></b>                                    |                       |                       |  |
| $r(A \rightarrow G) = r(G \rightarrow A)$                                    | 1.9803                | 2.0421                |  |
| $r(A \rightarrow C) = r(C \rightarrow A)$                                    | 9.4404                | 9.5318                |  |
| $r(A \rightarrow T) = r(T \rightarrow A)$                                    | 0.9423                | 0.9674                |  |
| $r(G \rightarrow C) = r(C \rightarrow G)$                                    | 0.8770                | 0.8840                |  |
| $r(G \rightarrow T) = r(T \rightarrow G)$                                    | 11.6367               | 12.0604               |  |
| $r(C \rightarrow T) = r(T \rightarrow C)$                                    | 1.0000                | 1.0000                |  |
| <b><i>Fraction of invariant sites</i></b>                                    |                       |                       |  |
| I parameter                                                                  | 0.2130                | 0.3091                |  |
