# Supplementary material for: SimpactCyan 1.0: An Open-source Simulator for Individual-Based Models in HIV Epidemiology with R and Python Interfaces
Source: bioRxiv or medRxiv preprint supplement (doi:10.1101/440834), 2019-11-21
Supplement: Supplementary file [file media-3.pdf]

**Table S3. Normalised topological properties of the phylogenetic trees reconstructed from empirical and synthetic data with matching sampling dates (See also Figure S1).**

|                                            | <b>Empirical data</b> | <b>Synthetic data</b> |  |  |  |  |  |  |  |
|--------------------------------------------|-----------------------|-----------------------|--|--|--|--|--|--|--|
| Sackin index of tree imbalance             | 0.102                 | 0.088                 |  |  |  |  |  |  |  |
| Colless index of tree imbalance            | 0.076                 | 0.059                 |  |  |  |  |  |  |  |
| Average size of ladders <sup>1</sup>       | 0.006                 | 0.007                 |  |  |  |  |  |  |  |
| Cherries <sup>2</sup>                      | 0.663                 | 0.635                 |  |  |  |  |  |  |  |
| IL number <sup>3</sup>                     | 0.339                 | 0.366                 |  |  |  |  |  |  |  |
| Maximum height of the tips                 | 0.083                 | 0.073                 |  |  |  |  |  |  |  |
| Pitchforks <sup>4</sup>                    | 0.451                 | 0.477                 |  |  |  |  |  |  |  |
| First staircase-ness measure <sup>5</sup>  | 0.600                 | 0.632                 |  |  |  |  |  |  |  |
| Second staircase-ness measure <sup>6</sup> | 0.603                 | 0.598                 |  |  |  |  |  |  |  |

1 A ladder is defined as a series of consecutive nodes in the tree, each of which has exactly one tip child. The size of the ladder is given by the number of nodes in the chain.

2 A cherry is a pair of sister tips.

3 The IL number is defined as the number of internal nodes with a single tip child.

4 Pitchforks are clades with three tips.

5 The proportion of subtrees that are imbalanced (i.e. subtrees where the left child has more tip descendants than the right child, or vice versa).

6 The average of all the  $\min(l,r)/\max(l,r)$  values of each subtree, where  $l$  and  $r$  are the number of tips in the left and right children of a subtree.
