# Supplementary material for: SimpactCyan 1.0: An Open-source Simulator for Individual-Based Models in HIV Epidemiology with R and Python Interfaces
Source: bioRxiv or medRxiv preprint supplement (doi:10.1101/440834), 2019-11-21
Supplement: Supplementary file [file media-4.pdf]

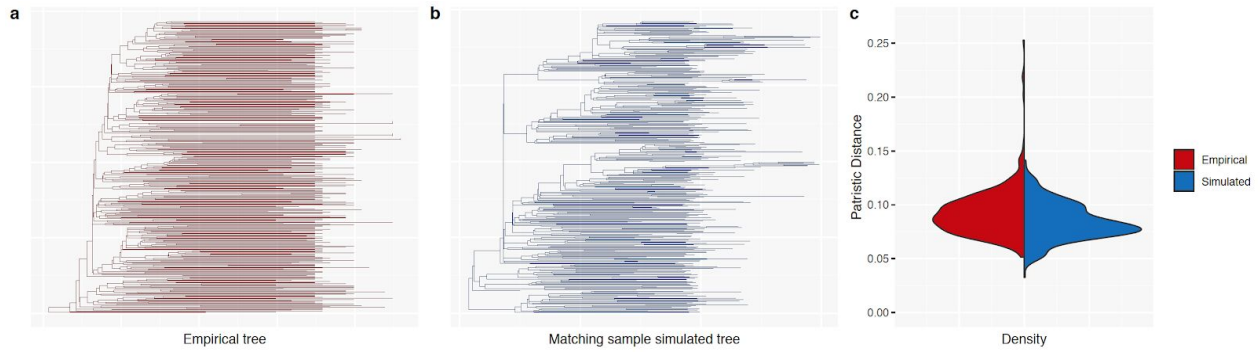

**Figure S1.** (a) Time-resolved phylogenetic tree, reconstructed from the empirical HIV sequence data. (b) Time-resolved phylogenetic tree, reconstructed from a subset of the synthetic HIV sequence data, with sampling dates that match those of the empirical dataset. (c) The density distribution of patristic distances of the respective phylogenetic trees.
